# Supplementary material for: CAMSAP2 organizes a γ-tubulin-independent microtubule nucleation centre through phase separation
Source: PubMed Central journal article supplement (PMC9239687; doi:10.7554/elife.77365), 2022-06-28
Supplement: elife-77365-fig6-data1.pdf [file elife-77365-fig6-data1.pdf]

| Full length | CC1-CKK  | CC3-CKK  |
|-------------|----------|----------|
| 18747.47    | 25078.35 | 3085.581 |
| 83693.64    | 24699.64 | 1171.466 |
| 25730.87    | 9782.182 | 1894.434 |
| 32941.46    | 11822.18 | 875.7019 |
| 43029.78    | 10510.75 | 1735.778 |
| 16500.07    | 20646.86 | 2180.827 |
| 18583.46    | 320.58   | 1385.943 |
| 27607.13    | 17046.51 | 2088.197 |
| 8119.855    | 9339.264 | 2075.767 |
| 6079.744    | 15100.88 | 2923.762 |
| 11636.42    | 18209.59 | 4141.859 |
| 38094.9     | 13977.35 | 3868.955 |
| 12046.48    | 4216.028 | 1034.292 |
| 24077.54    | 7784.669 | 2188.433 |
| 31854.55    | 16018.8  | 1303.421 |
| 2738.278    | 11948.24 | 1819.892 |
| 12641.32    | 7537.796 | 1445.29  |
| 9015.745    | 14523.14 | 1036.055 |
| 21505.55    | 36508.18 | 3404.477 |
| 43428.2     | 16207.95 | 2667.782 |
| 34253.85    | 22105.07 | 1115.245 |
| 92647.37    | 19499.99 | 1573.576 |
| 10323.06    | 19890.04 | 4867.455 |
| 23269.27    | 8480.875 | 1893.079 |
| 16782.68    | 7260.752 | 5994.384 |
| 12664.76    | 25788.14 | 4692.805 |
| 16682.02    | 25332.63 | 2305.067 |
| 36075.28    | 19358.69 | 2122.498 |
| 7112.028    | 17844.92 | 2398.807 |
| 49214.36    | 20433.06 | 3387.289 |
| 61160.97    | 18434.42 | 4057.938 |
| 54015.41    | 16625.92 | 3179.191 |
| 24688.04    | 12622.49 | 3164.477 |
| 48677.63    | 15227.92 | 6628.158 |
| 55651.01    | 6344.795 | 3588.399 |
| 17872.23    | 16829.04 | 1470.087 |
| 20617.32    | 9362.043 | 3688.56  |
| 58221.02    | 7377.568 | 3076.46  |
| 25173.6     | 10237.65 | 1959.901 |
| 33808.84    | 6383.476 | 3268.929 |
| 42833.15    | 6269.091 | 3279.692 |
| 52130.02    | 9639.022 | 2044.259 |
| 29751.04    | 13847.82 | 2065.92  |
| 23618.11    | 28011.5  | 1388.226 |
| 49028.73    | 27262.16 | 1655.926 |
| 105990.4    | 21078.49 | 2020.212 |
| 95739.2     | 27671.42 | 2400.434 |

|          |          |          |
|----------|----------|----------|
| 52888.94 | 12226.15 | 1873.222 |
| 27456.24 | 10296.88 | 1613.119 |
| 23745.78 | 12550.24 | 3967.444 |
| 107285.3 | 13825.2  | 3528.004 |
| 34865.98 | 15453.99 | 3111.948 |
| 17371.87 | 11023.26 | 3438.618 |
| 26190.98 | 48236.02 | 2250.386 |
| 265.538  | 31701.86 | 5957.429 |
| 32350.88 | 20437.41 | 3585.139 |
| 42337.47 | 11430.31 | 1950.847 |
| 30954.49 | 22291.38 | 2309.534 |
| 39230.26 | 14130.07 | 36.3     |
| 83635.41 | 27371.5  | 4283.409 |
| 30696.04 | 9829.004 | 2056.309 |
| 78623.54 | 8618.954 | 1228.239 |
| 33884.07 |          | 3002.454 |
| 83881.78 | 35748.46 | 5345.961 |
| 84715.57 | 12737.51 | 1950.416 |
| 97570.25 | 16844.33 | 1193.688 |
| 127302.4 | 285.194  | 2969.21  |
| 82766.65 | 10585.52 | 2631.178 |
| 118867.2 | 1098.994 | 1960.658 |
| 111096.9 | 22674.51 | 2647.098 |
| 52296.68 | 27490.07 | 4057.246 |
| 37293.71 | 384.54   | 4142.348 |
| 13829.63 | 35901.19 | 5755.974 |
| 20506.5  | 36396.59 | 3479.911 |
| 48869.14 | 48077.43 | 4267.061 |
| 14779.85 | 18506.86 | 2734.461 |
| 66116.35 | 12558.38 | 3472.533 |
| 26263.63 | 20872.65 | 3317.672 |
| 32671.71 | 25358.92 | 3098.589 |
| 44374.02 | 19323.16 | 4413.732 |
| 75472.91 | 22225.1  | 6998.969 |
| 26515.64 | 14522.66 | 5046.792 |
| 86694.88 | 22310.22 | 50.171   |
| 17706.88 | 30976.33 | 2097.574 |
| 25779.75 | 17134.35 | 3477.107 |
| 32365.38 | 20313.97 | 4101.97  |
| 63357.48 | 27578.15 | 2067.636 |
| 45713.22 | 25925.21 | 3124.685 |
| 14397.54 | 12368.88 | 2295.719 |
| 51409.92 | 17052.29 | 1846.195 |
| 94652.63 | 18037.48 | 2469.715 |
| 19325.18 | 37539.73 | 2379.03  |
| 112288.8 | 18297.55 | 1565.472 |
| 10914.95 | 20874.56 | 2866.168 |
| 83325.08 | 17026.81 | 4323.507 |

|          |          |          |
|----------|----------|----------|
| 31113.74 | 35800.01 | 1761.805 |
| 25430.18 | 37970.2  | 4354.357 |
| 20106.67 | 20538.41 | 4059.84  |
| 67593.52 | 16881.08 | 3049.046 |
| 55352.28 | 17878.66 | 5146.481 |
