# Supplementary material for: CAMSAP2 organizes a γ-tubulin-independent microtubule nucleation centre through phase separation
Source: eLife journal article supplement (doi:10.7554/elife.77365), 2022-05-25
Supplement: fig3-figsupp1-data1 [file elife-77365-fig3-figsupp1-data1-v1.pdf]

| Repeat1<br>ama | BL_corr3[t] |            | Repeat2<br>ama | BL_corr3[t] |            | Repeat3<br>ama | BL_corr3[t] |            |
|----------------|-------------|------------|----------------|-------------|------------|----------------|-------------|------------|
| 0              | 0.25222     | 0.13414975 | 0              | 0.25167     | 0.10825171 | 0              | 0.207129    | 0.07793074 |
| 10             | 0.291598    | 0.14558705 | 10             | 0.289514    | 0.11253529 | 10             | 0.257711    | 0.08207288 |
| 20             | 0.287226    | 0.15670174 | 20             | 0.288403    | 0.11676422 | 20             | 0.285447    | 0.08615126 |
| 30             | 0.342844    | 0.16750291 | 30             | 0.294187    | 0.12093921 | 30             | 0.270008    | 0.09016685 |
| 40             | 0.407902    | 0.17799941 | 40             | 0.377704    | 0.12506094 | 40             | 0.337378    | 0.09412062 |
| 50             | 0.413999    | 0.18819982 | 50             | 0.42254     | 0.1291301  | 50             | 0.349369    | 0.09801352 |
| 60             | 0.422893    | 0.19811251 | 60             | 0.401527    | 0.13314735 | 60             | 0.360759    | 0.1018465  |
| 70             | 0.47262     | 0.20774558 | 70             | 0.414962    | 0.13711335 | 70             | 0.378487    | 0.10562048 |
| 80             | 0.488638    | 0.21710693 | 80             | 0.447249    | 0.14102877 | 80             | 0.402454    | 0.10933635 |
| 90             | 0.452117    | 0.22620422 | 90             | 0.359115    | 0.14489424 | 90             | 0.303349    | 0.11299502 |
| 100            | 0.454716    | 0.23504489 | 100            | 0.352501    | 0.1487104  | 100            | 0.345002    | 0.11659737 |
| 110            | 0.428047    | 0.2436362  | 110            | 0.369204    | 0.15247789 | 110            | 0.364649    | 0.12014426 |
| 120            | 0.499718    | 0.25198516 | 120            | 0.378826    | 0.15619732 | 120            | 0.375369    | 0.12363656 |
| 130            | 0.502194    | 0.26009862 | 130            | 0.40814     | 0.1598693  | 130            | 0.350138    | 0.12707509 |
| 140            | 0.421089    | 0.26798322 | 140            | 0.37169     | 0.16349444 | 140            | 0.332813    | 0.13046068 |
| 150            | 0.468808    | 0.27564541 | 150            | 0.374995    | 0.16707334 | 150            | 0.335166    | 0.13379416 |
| 160            | 0.475823    | 0.28309148 | 160            | 0.361235    | 0.17060659 | 160            | 0.319096    | 0.13707632 |
| 170            | 0.472363    | 0.2903275  | 170            | 0.342917    | 0.17409477 | 170            | 0.345017    | 0.14030796 |
| 180            | 0.485723    | 0.29735942 | 180            | 0.404858    | 0.17753845 | 180            | 0.348812    | 0.14348984 |
| 190            | 0.477556    | 0.30419298 | 190            | 0.361292    | 0.18093821 | 190            | 0.369434    | 0.14662275 |
| 200            | 0.480154    | 0.31083379 | 200            | 0.351745    | 0.1842946  | 200            | 0.341641    | 0.14970742 |
| 210            | 0.542533    | 0.31728728 | 210            | 0.39812     | 0.18760817 | 210            | 0.371008    | 0.15274461 |
| 220            | 0.51643     | 0.32355873 | 220            | 0.37853     | 0.19087948 | 220            | 0.352936    | 0.15573504 |
| 230            | 0.524221    | 0.32965327 | 230            | 0.388948    | 0.19410906 | 230            | 0.342028    | 0.15867944 |
| 240            | 0.552451    | 0.33557591 | 240            | 0.408805    | 0.19729744 | 240            | 0.341895    | 0.16157851 |
| 250            | 0.534093    | 0.34133148 | 250            | 0.40705     | 0.20044515 | 250            | 0.360793    | 0.16443295 |
| 260            | 0.539068    | 0.3469247  | 260            | 0.40472     | 0.20355271 | 260            | 0.376504    | 0.16724345 |
| 270            | 0.611688    | 0.35236015 | 270            | 0.42604     | 0.20662063 | 270            | 0.362212    | 0.17001068 |
| 280            | 0.575086    | 0.35764228 | 280            | 0.394622    | 0.20964941 | 280            | 0.388219    | 0.17273532 |
| 290            | 0.554343    | 0.36277541 | 290            | 0.41613     | 0.21263956 | 290            | 0.352485    | 0.17541801 |
| 300            | 0.553313    | 0.36776375 | 300            | 0.419403    | 0.21559157 | 300            | 0.364362    | 0.1780594  |
| 310            | 0.535171    | 0.37261139 | 310            | 0.416722    | 0.21850592 | 310            | 0.391535    | 0.18066013 |
| 320            | 0.52977     | 0.37732228 | 320            | 0.455674    | 0.2213831  | 320            | 0.374613    | 0.18322083 |
| 330            | 0.581457    | 0.38190029 | 330            | 0.426304    | 0.22422358 | 330            | 0.406899    | 0.1857421  |
| 340            | 0.55802     | 0.38634916 | 340            | 0.413817    | 0.22702782 | 340            | 0.410424    | 0.18822456 |
| 350            | 0.576124    | 0.39067255 | 350            | 0.467866    | 0.22979629 | 350            | 0.383888    | 0.1906688  |
| 360            | 0.594937    | 0.39487398 | 360            | 0.45773     | 0.23252945 | 360            | 0.383663    | 0.19307542 |
| 370            | 0.547992    | 0.3989569  | 370            | 0.45267     | 0.23522774 | 370            | 0.379233    | 0.19544499 |
| 380            | 0.562185    | 0.40292465 | 380            | 0.453587    | 0.23789162 | 380            | 0.394315    | 0.19777808 |
| 390            | 0.558171    | 0.40678048 | 390            | 0.440903    | 0.24052151 | 390            | 0.399132    | 0.20007526 |
| 400            | 0.624391    | 0.41052755 | 400            | 0.443111    | 0.24311786 | 400            | 0.439689    | 0.20233707 |
| 410            | 0.610089    | 0.41416892 | 410            | 0.481149    | 0.24568109 | 410            | 0.40746     | 0.20456406 |
| 420            | 0.644697    | 0.41770758 | 420            | 0.445319    | 0.24821162 | 420            | 0.428638    | 0.20675677 |
| 430            | 0.626747    | 0.42114642 | 430            | 0.46597     | 0.25070987 | 430            | 0.411096    | 0.20891573 |
| 440            | 0.615981    | 0.42448826 | 440            | 0.469246    | 0.25317626 | 440            | 0.398411    | 0.21104145 |
| 450            | 0.650033    | 0.42773583 | 450            | 0.496869    | 0.25561118 | 450            | 0.41106     | 0.21313444 |
| 460            | 0.61895     | 0.4308918  | 460            | 0.493647    | 0.25801505 | 460            | 0.40595     | 0.21519522 |
| 470            | 0.672048    | 0.43395875 | 470            | 0.506457    | 0.26038825 | 470            | 0.46051     | 0.21722427 |
| 480            | 0.673994    | 0.43693918 | 480            | 0.488838    | 0.26273118 | 480            | 0.457392    | 0.21922208 |
| 490            | 0.63169     | 0.43983555 | 490            | 0.493869    | 0.26504422 | 490            | 0.455971    | 0.22118914 |
| 500            | 0.686609    | 0.44265021 | 500            | 0.512441    | 0.26732776 | 500            | 0.445178    | 0.22312592 |
| 510            | 0.664379    | 0.44538548 | 510            | 0.519897    | 0.26958216 | 510            | 0.479247    | 0.22503288 |
| 520            | 0.65954     | 0.4480436  | 520            | 0.538191    | 0.27180782 | 520            | 0.438273    | 0.22691049 |
| 530            | 0.687855    | 0.45062673 | 530            | 0.539147    | 0.27400508 | 530            | 0.502517    | 0.22875919 |
| 540            | 0.656843    | 0.45313701 | 540            | 0.463262    | 0.27617431 | 540            | 0.466167    | 0.23057944 |
| 550            | 0.628094    | 0.45557647 | 550            | 0.489506    | 0.27831587 | 550            | 0.445651    | 0.23237166 |
| 560            | 0.647758    | 0.45794712 | 560            | 0.497398    | 0.28043012 | 560            | 0.422581    | 0.23413629 |
| 570            | 0.676834    | 0.46025091 | 570            | 0.48953     | 0.28251739 | 570            | 0.478673    | 0.23587376 |
| 580            | 0.697474    | 0.4624897  | 580            | 0.466444    | 0.28457804 | 580            | 0.440314    | 0.23758448 |
| 590            | 0.656675    | 0.46466535 | 590            | 0.478615    | 0.28661241 | 590            | 0.433579    | 0.23926886 |
| 600            | 0.673314    | 0.46677963 | 600            | 0.49562     | 0.28862082 | 600            | 0.433575    | 0.24092732 |
| 610            | 0.66167     | 0.46883427 | 610            | 0.5001      | 0.29060362 | 610            | 0.458733    | 0.24256024 |
| 620            | 0.636226    | 0.47083095 | 620            | 0.494187    | 0.29256112 | 620            | 0.473445    | 0.24416803 |
| 630            | 0.646208    | 0.47277131 | 630            | 0.483288    | 0.29449365 | 630            | 0.425407    | 0.24575106 |
| 640            | 0.660423    | 0.47465694 | 640            | 0.492864    | 0.29640154 | 640            | 0.475681    | 0.24730973 |
| 650            | 0.6621      | 0.47648938 | 650            | 0.516821    | 0.29828508 | 650            | 0.499073    | 0.2488444  |
| 660            | 0.650111    | 0.47827013 | 660            | 0.507417    | 0.3001446  | 660            | 0.46217     | 0.25035544 |
| 670            | 0.594463    | 0.48000066 | 670            | 0.505333    | 0.3019804  | 670            | 0.443474    | 0.25184323 |

|      |          |            |      |          |            |      |          |            |
|------|----------|------------|------|----------|------------|------|----------|------------|
| 680  | 0.694702 | 0.48168236 | 680  | 0.536533 | 0.30379278 | 680  | 0.452031 | 0.25330811 |
| 690  | 0.675437 | 0.48331663 | 690  | 0.505688 | 0.30558204 | 690  | 0.44513  | 0.25475044 |
| 700  | 0.606392 | 0.4849048  | 700  | 0.472003 | 0.30734848 | 700  | 0.490949 | 0.25617057 |
| 710  | 0.619586 | 0.48644818 | 710  | 0.528946 | 0.30909239 | 710  | 0.474332 | 0.25756883 |
| 720  | 0.646212 | 0.48794802 | 720  | 0.540441 | 0.31081405 | 720  | 0.503499 | 0.25894557 |
| 730  | 0.595354 | 0.48940555 | 730  | 0.536651 | 0.31251375 | 730  | 0.484021 | 0.26030112 |
| 740  | 0.729006 | 0.49082197 | 740  | 0.558469 | 0.31419177 | 740  | 0.477035 | 0.2616358  |
| 750  | 0.692949 | 0.49219843 | 750  | 0.552391 | 0.31584838 | 750  | 0.518926 | 0.26294993 |
| 760  | 0.630854 | 0.49353607 | 760  | 0.546654 | 0.31748386 | 760  | 0.475606 | 0.26424383 |
| 770  | 0.668579 | 0.49483598 | 770  | 0.550645 | 0.31909848 | 770  | 0.495042 | 0.26551781 |
| 780  | 0.724069 | 0.49609921 | 780  | 0.55555  | 0.32069251 | 780  | 0.482105 | 0.26677218 |
| 790  | 0.744786 | 0.49732682 | 790  | 0.538168 | 0.3222662  | 790  | 0.472225 | 0.26800724 |
| 800  | 0.735055 | 0.4985198  | 800  | 0.508809 | 0.32381981 | 800  | 0.479873 | 0.26922329 |
| 810  | 0.741426 | 0.49967913 | 810  | 0.525911 | 0.32535361 | 810  | 0.482267 | 0.27042062 |
| 820  | 0.745637 | 0.50080575 | 820  | 0.539989 | 0.32686785 | 820  | 0.508806 | 0.27159952 |
| 830  | 0.72167  | 0.5019006  | 830  | 0.579765 | 0.32836277 | 830  | 0.465825 | 0.27276026 |
| 840  | 0.710457 | 0.50296456 | 840  | 0.528253 | 0.32983861 | 840  | 0.480549 | 0.27390314 |
| 850  | 0.771341 | 0.50399852 | 850  | 0.530218 | 0.33129564 | 850  | 0.497513 | 0.27502843 |
| 860  | 0.74197  | 0.5050033  | 860  | 0.536242 | 0.33273408 | 860  | 0.487808 | 0.27613639 |
| 870  | 0.683268 | 0.50597975 | 870  | 0.51255  | 0.33415417 | 870  | 0.492915 | 0.27722729 |
| 880  | 0.716465 | 0.50692865 | 880  | 0.553119 | 0.33555614 | 880  | 0.458101 | 0.27830141 |
| 890  | 0.6643   | 0.50785078 | 890  | 0.53656  | 0.33694023 | 890  | 0.487469 | 0.27935898 |
| 900  | 0.62858  | 0.50874691 | 900  | 0.532104 | 0.33830667 | 900  | 0.460973 | 0.28040028 |
| 910  | 0.730871 | 0.50961775 | 910  | 0.482176 | 0.33965567 | 910  | 0.454524 | 0.28142554 |
| 920  | 0.688433 | 0.51046404 | 920  | 0.569296 | 0.34098747 | 920  | 0.476548 | 0.28243503 |
| 930  | 0.67148  | 0.51128645 | 930  | 0.531603 | 0.34230228 | 930  | 0.494368 | 0.28342897 |
| 940  | 0.666843 | 0.51208566 | 940  | 0.590112 | 0.34360032 | 940  | 0.461924 | 0.28440761 |
| 950  | 0.666391 | 0.51286233 | 950  | 0.56924  | 0.3448818  | 950  | 0.47041  | 0.28537119 |
| 960  | 0.696158 | 0.51361709 | 960  | 0.58594  | 0.34614693 | 960  | 0.516922 | 0.28631993 |
| 970  | 0.690961 | 0.51435056 | 970  | 0.558471 | 0.34739593 | 970  | 0.518412 | 0.28725407 |
| 980  | 0.719682 | 0.51506334 | 980  | 0.586062 | 0.34862899 | 980  | 0.464527 | 0.28817382 |
| 990  | 0.715022 | 0.51575602 | 990  | 0.537172 | 0.34984632 | 990  | 0.542516 | 0.28907942 |
| 1000 | 0.664601 | 0.51642915 | 1000 | 0.539941 | 0.35104813 | 1000 | 0.472563 | 0.28997108 |
| 1010 | 0.711431 | 0.5170833  | 1010 | 0.560948 | 0.35223461 | 1010 | 0.485632 | 0.29084901 |
| 1020 | 0.702027 | 0.517719   | 1020 | 0.573003 | 0.35340595 | 1020 | 0.507116 | 0.29171343 |
| 1030 | 0.645487 | 0.51833677 | 1030 | 0.59541  | 0.35456235 | 1030 | 0.503148 | 0.29256453 |
| 1040 | 0.752977 | 0.51893711 | 1040 | 0.553732 | 0.355704   | 1040 | 0.490477 | 0.29340254 |
| 1050 | 0.678997 | 0.51952051 | 1050 | 0.580921 | 0.35683108 | 1050 | 0.532565 | 0.29422765 |
| 1060 | 0.769    | 0.52008746 | 1060 | 0.572427 | 0.35794379 | 1060 | 0.490073 | 0.29504005 |
| 1070 | 0.68848  | 0.52063842 | 1070 | 0.596832 | 0.35904231 | 1070 | 0.493507 | 0.29583995 |
| 1080 | 0.792269 | 0.52117384 | 1080 | 0.59748  | 0.36012681 | 1080 | 0.538097 | 0.29662753 |
| 1090 | 0.73114  | 0.52169415 | 1090 | 0.552673 | 0.36119748 | 1090 | 0.46314  | 0.29740299 |
| 1100 | 0.766088 | 0.52219979 | 1100 | 0.57684  | 0.36225449 | 1100 | 0.540105 | 0.29816651 |
| 1110 | 0.749883 | 0.52269116 | 1110 | 0.575417 | 0.36329802 | 1110 | 0.523481 | 0.29891828 |
| 1120 | 0.763192 | 0.52316867 | 1120 | 0.586614 | 0.36432824 | 1120 | 0.537761 | 0.29965847 |
| 1130 | 0.806589 | 0.52363272 | 1130 | 0.593359 | 0.36534531 | 1130 | 0.528817 | 0.30038727 |
