# Supplementary material for: CAMSAP2 organizes a γ-tubulin-independent microtubule nucleation centre through phase separation
Source: eLife journal article supplement (doi:10.7554/elife.77365), 2022-05-25
Supplement: fig7-data1 [file elife-77365-fig7-data1-v1.pdf]

**number of tubulin rings and that of microtubules**

| No. of rings          |          |          |          |          |
|-----------------------|----------|----------|----------|----------|
| Tubulin conc.         | Tub 10uM | Tub 10uM | Tub 10uM | Tub 10uM |
| CAMSAP CC1-CC3 conc.  | 1uM      | 1uM      | 1uM      | 1uM      |
| Time (min)            | On Ice   | 1        | 3        | 10       |
| Ring No.              |          | 6        | 5        | 2        |
| /0.75 $\mu\text{m}^2$ |          | 20       | 6        | 2        |
|                       |          | 31       | 11       | 9        |
|                       |          | 20       | 10       | 3        |
|                       |          | 35       | 8        | 5        |
|                       |          | 19       | 6        | 7        |
|                       |          | 59       | 14       | 3        |
|                       |          | 33       | 21       | 6        |
| Average               |          | 30.875   | 10.25    | 5.5      |
| SD                    |          | 13.0432  | 5.2030   | 2.0000   |

| No. of microtubules   |          |          |          |          |
|-----------------------|----------|----------|----------|----------|
| Tubulin conc.         | Tub 10uM | Tub 10uM | Tub 10uM | Tub 10uM |
| CAMSAP CC1-CC3 conc.  | 1uM      | 1uM      | 1uM      | 1uM      |
| Time (min)            | On Ice   | 1min     | 3min     | 10min    |
| Microtubule No.       |          | 0        | 17       | 33       |
| /0.75 $\mu\text{m}^2$ |          | 0        | 16       | 26       |
|                       |          | 0        | 15       | 9        |
|                       |          | 0        | 13       | 26       |
|                       |          | 0        | 8        | 23       |
|                       |          | 0        | 5        | 28       |
|                       |          | 0        | 0        | 24       |
|                       |          | 0        | 6        | 25       |
| Average               |          | 0        | 10       | 24.25    |
| SD                    |          | 0.0000   | 6.1412   | 6.8817   |

Converted to /1  $\mu\text{m}^2$

| Time | Ring | MT   | sd_ring | sd_MT |
|------|------|------|---------|-------|
| 0    |      | 54.9 | 18.2    | 0.0   |
| 1    |      | 18.2 | 9.2     | 17.8  |
| 3    |      | 9.8  | 3.6     | 43.1  |
| 10   |      | 2.2  | 2.5     | 46.0  |
